RESEARCH ARTICLE

# B Cell, Th17, and Neutrophil Related Cerebrospinal Fluid Cytokine/Chemokines Are Elevated in MOG Antibody Associated Demyelination

Kavitha Kothur<sup>1</sup>, Louise Wienholt<sup>2</sup>, Esther M Tantsis<sup>1</sup>, John Earl<sup>3</sup>, Sushil Bandodkar<sup>3</sup>, Kristina Prelog<sup>4</sup>, Fiona Tea<sup>1</sup>, Sudarshini Ramanathan<sup>1</sup>, Fabienne Brilot<sup>1</sup>, Russell C. Dale<sup>1\*</sup>

**1** Neuroimmunology group, Institute for Neuroscience and Muscle Research, The Children's Hospital at Westmead, University of Sydney, Sydney, NSW, Australia, **2** Department of Clinical Immunology, Royal Prince Alfred Hospital, Sydney, NSW, Australia, **3** Department of Biochemistry, The Children's Hospital at Westmead, Sydney, NSW, Australia, **4** Department of Medical Imaging, The Children's Hospital at Westmead, Sydney, NSW, Australia

\* [russell.dale@health.nsw.gov.au](mailto:russell.dale@health.nsw.gov.au)

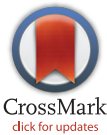

**OPEN ACCESS**

**Citation:** Kothur K, Wienholt L, Tantsis EM, Earl J, Bandodkar S, Prelog K, et al. (2016) B Cell, Th17, and Neutrophil Related Cerebrospinal Fluid Cytokine/Chemokines Are Elevated in MOG Antibody Associated Demyelination. PLoS ONE 11(2): e0149411. doi:10.1371/journal.pone.0149411

**Editor:** Edgar Meinel, LMU Munich, GERMANY

**Received:** November 15, 2015

**Accepted:** February 1, 2016

**Published:** February 26, 2016

**Copyright:** © 2016 Kothur et al. This is an open access article distributed under the terms of the [Creative Commons Attribution License](https://creativecommons.org/licenses/by/4.0/), which permits unrestricted use, distribution, and reproduction in any medium, provided the original author and source are credited.

**Data Availability Statement:** All relevant data are within the paper and its Supporting Information file.

**Funding:** This work was supported by a scholarship from the Petre Foundation, an Australian Postgraduate award, and Multiple Sclerosis Research Australia. The funders had no role in study design, data collection and analysis, decision to publish, or preparation of the manuscript.

**Competing Interests:** The authors have declared that no competing interests exist.

**Abbreviations:** MOG, Myelin oligodendrocyte glycoprotein antibody; ADEM, Acute Disseminated

## Abstract

### Background

Myelin oligodendrocyte glycoprotein antibody (MOG Ab) associated demyelination represents a subgroup of autoimmune demyelination that is separate from multiple sclerosis and aquaporin 4 IgG-positive NMO, and can have a relapsing course. Unlike NMO and MS, there is a paucity of literature on immunopathology and CSF cytokine/chemokines in MOG Ab associated demyelination.

### Aim

To study the differences in immunopathogenesis based on cytokine/chemokine profile in MOG Ab-positive (POS) and -negative (NEG) groups.

### Methods

We measured 34 cytokines/chemokines using multiplex immunoassay in CSF collected from paediatric patients with serum MOG Ab POS [acute disseminated encephalomyelitis (ADEM = 8), transverse myelitis (TM = 2) n = 10] and serum MOG Ab NEG (ADEM = 5, TM = 4, n = 9) demyelination. We generated normative data using CSF from 20 non-inflammatory neurological controls.

### Results

The CSF cytokine and chemokine levels were higher in both MOG Ab POS and MOG Ab NEG demyelination groups compared to controls. The CSF in MOG Ab POS patients showed predominant elevation of B cell related cytokines/chemokines (CXCL13, APRIL, BAFF and CCL19) as well as some of Th17 related cytokines (IL-6 AND G-CSF) compared

Encephalomyelitis; TM, Transverse Myelitis; NMO, Neuromyelitis Optica; NMOSD, Neuromyelitis Optica Spectrum Disorders; MRI, Magnetic Resonance Imaging; CSF, Cerebrospinal Fluid; Ab, Antibody; POS, Positive; NEG, Negative; EAE, Experimental Allergic Encephalomyelitis.

to MOG Ab NEG group (all  $p < 0.01$ ). In addition, patients with elevated CSF MOG antibodies had higher CSF CXCL13, CXCL12, CCL19, IL-17A and G-CSF than patients without CSF MOG antibodies.

## Conclusion

Our findings suggest that MOG Ab POS patients have a more pronounced CNS inflammatory response with elevation of predominant humoral associated cytokines/chemokines, as well as some Th 17 and neutrophil related cytokines/chemokines suggesting a differential inflammatory pathogenesis associated with MOG antibody seropositivity. This cytokine/chemokine profiling provides new insight into disease pathogenesis, and improves our ability to monitor inflammation and response to treatment. In addition, some of these molecules may represent potential immunomodulatory targets.

## Introduction

Myelin oligodendrocyte glycoprotein (MOG) is a myelin antigen located at the outer surface of the central nervous system (CNS) myelin sheath, and is a target for autoimmune responses that results in CNS inflammation and demyelination [1]. Using cell-based assays, serum MOG antibody has been shown to be primarily associated with pediatric acute disseminated encephalomyelitis (ADEM), optic neuritis (ON), transverse myelitis (TM), and aquaporin 4 antibody-negative neuromyelitis optica (NMO) [2–4]. In adults, MOG antibody is predominantly seen in association with NMO/NMOSD, including bilateral and/or recurrent optic neuritis, and transverse myelitis, but rarely seen in patients with MS [5–8]. While some studies evaluating paediatric patients showed a persistence of MOG antibody seropositivity with relapsing disease, the role of MOG antibody as a biomarker for disease recurrence or severity remains to be clarified [9, 10]. Relapsing MOG Ab demyelination syndromes are considered distinct from multiple sclerosis (MS) based on clinical and neuroimaging features, and MOG antibody seropositivity is associated with a non-MS course at 1-year follow-up [11, 12].

There is emerging evidence that MOG antibodies are pathogenic in human demyelinating diseases. *In vitro* experiments have shown that patient serum containing MOG antibodies can induce complement, natural killer cell and antibody dependent cell mediated toxicity, and disrupt oligodendrocyte cytoskeleton [2, 13–16]. NMO associated with aquaporin-4 antibodies is an astrocytopathy and there are a large number of studies demonstrating a complex immunopathology involving B cells, eosinophils, neutrophils, and Th17 cell mechanisms [17–19]. By contrast, other than autoantibody-associated mechanisms, there is limited information available on the immune-pathogenesis of MOG antibody-mediated inflammation. Likewise, although the presence of different CSF cytokines and chemokines has previously been investigated in NMO [20], CSF cytokine studies in MOG-associated demyelination are lacking.

Cytokines/chemokines are biologically active polypeptide intercellular messengers that have pleiotropic effects on a variety of cell types leading to immune system activation, including proliferation, differentiation, and recruitment of immune cells to site of inflammation contributing to immunopathogenesis [21]. There is a considerable overlap and redundancy between cytokines/chemokines with respect to individual functions, despite some unique properties. CD41 naive T cells can differentiate into distinct subsets (Th1, Th2, Th17, Th22, and T-follicular

effector cells) depending on the nature of antigen and surrounding cytokine milieu which in turn causes inflammation through cytokine and chemokine responses [21–23].

In view of emerging evidence of pathogenicity of MOG antibodies, we hypothesize that MOG Ab POS demyelination has a dominant humoral immune pathogenesis compared to MOG Ab NEG group. In this study, we investigated and analysed a broad array of CSF cytokines/chemokines in MOG Ab POS and NEG groups, and their association with clinical/laboratory findings.

## Patients and Methods

### Patients and Controls

As part of the ethically approved protocol, we wrote to all parents and gained written consent to use the stored CSF for this study. This study was approved by HREC of Sydney Children's Hospital network (LNRSSA/14/SCHN/283). We selected patients with a first episode of acute CNS demyelinating disease who had stored frozen acute CSF available, using Neurology and Neuroimmunology clinical databases at the Children's Hospital at Westmead, Sydney, Australia. All the CSF samples in controls and patients were collected over a 7 yr period from 2007–2014 except for 2 controls in whom CSF was collected between 2001 and 2002. Patients were classified according to MOG antibody serostatus on stored acute sera using a fluorescence-activated cell sorting (FACS) live cell-based assay. We detected antibody binding of patient serum and CSF IgG to human full-length surface MOG transduced in HEK293 cells as previously described [2, 7]. Samples were considered positive if they were above threshold on at least 2 of 3 repeated experiments.

A total of 10 patients with MOG Ab POS [acute disseminated encephalomyelitis (ADEM) = 8, transverse myelitis (TM) = 1, and TM + optic neuritis (ON) = 1] and 9 patients with MOG Ab NEG (ADEM = 5 and TM = 4) demyelination were included. We ensured that MOG Ab POS and NEG groups were clinically similar with regard to proportions of ADEM and TM. Patients with ADEM and TM fulfilled International Pediatric MS Study Group (IPMSSG) diagnostic criteria 2013 [24]. Twenty non-inflammatory neurological controls were used to generate a reference range, and included cerebral palsy (n = 8) [kernicterus (2), extreme prematurity (1), placental insufficiency (1), unknown cause (4)], neurotransmitter disorders (n = 4) [Dopa responsive dystonia (3), and 6PTPS deficiency (1)], monogenic movement disorders (n = 6), stereotypy (n = 1), and congenital myasthenic syndrome (n = 1). All CSF samples were collected during routine diagnostic work-up, prior to commencing treatment, and samples were frozen at -40 degrees until analysis. The clinical features and CSF findings are presented in brief in [Table 1](#).

**MRI.** The radiological abnormalities on acute and follow up MRI brain including extent and configuration of lesions were recorded and rated by neuroradiologist (KP) blinded to diagnosis according to the previously published protocol by Baumann et al [25]. The sequences reviewed included T2 axial, T2 fluid attenuated inversion recovery-coronal, T1-sagittal, T1-axial with gadolinium (GAD), spinal cord T2 axial, sagittal and T1-sagittal with GAD.

**Multiplex cytokine/chemokine immunoassay.** Thirty-two cytokines were measured by multiplexed fluorescent bead-based immunoassay detection (MILLIPLEX<sup>®</sup> MAP system, Millipore Corporation, Missouri U.S.A.) according to the manufacturer's instructions, using a combination of 23-plex (MPHCYTOMAG60K23), 6 plex (MPHCYP2MAG62K06), and 3-plex (MPHCYP3MAG63K03) Millipore Human Cytokine panel kits. The 23-plex kit contained antibody-conjugated beads for following cytokines and chemokines: IL-1ra, GM-CSF, IL-1b, TNF- $\alpha$ , IL-2, IL-4, IL-6, IL-8, IL-10, IL-13, IL-17A, IFN- $\gamma$ , CCL2/MCP-1, CCL5/RANTES, CXCL1/GRO, CXCL10/IP-10, CCL3/MIP-1a, CCL4/MIP-1b, IL-12 (p40) and IL-12

**Table 1. Clinical and laboratory investigations in MOG Ab POS and NEG demyelination syndromes.**

|                                                                      | MOG Ab POS (n = 10)                    | MOG Ab NEG (n = 9)         | Control (n = 20) |
|----------------------------------------------------------------------|----------------------------------------|----------------------------|------------------|
| Clinical syndrome (n)                                                | ADEM (8), TM (1), TM+ON (1)            | ADEM (5), TM (4)           | NIND             |
| Age, median (range), y                                               | 4.7 (2–14) <sup>a</sup>                | 9.3 (5.5–13)               | 4.9 (0.3–14)*    |
| Timing of CSF from onset of neurological symptoms, median (range), d | 6 (2–15)                               | 4 (2–7)                    | N/A              |
| Elevated ESR (>20mm/hr)(proportion)                                  | 6/9                                    | 2/5                        | N/A              |
| CSF Pleocytosis, median (range), 10 <sup>6</sup> /L                  | 33 (0–175)                             | 17.5 (0–66)                | 0 (0–3)          |
| CSF neutrophils, median (range), 10 <sup>6</sup> /L                  | 5 (0–25)                               | 1 (0–6)                    | 0 (0–1)          |
| CSF protein, median (range), mg/dl                                   | 0.42 (0.15–0.71)                       | 0.29 (0.11–0.70)           | 0.25 (0.1–0.78)  |
| CSF IgG, median (range), g/L (n)                                     | 0.04 (0.026–0.08) <sup>b</sup> (n = 7) | 0.025 (0.009–0.04) (n = 6) | N/M              |
| CSF IgG/albumin, median (range)# (n)                                 | 18 (13–27)(n = 7)                      | 14 (11–23) (n = 5)         | N/M              |
| FU outcome (MRS score)                                               |                                        |                            | N/A              |
|                                                                      | No disability (0–1)                    | 4                          | 6                |
|                                                                      | Mild disability (2)                    | 5                          | 2                |
|                                                                      | Moderate disability (3)                | 1                          | 1                |
| Duration of FU, mean (SD), mo                                        | 20.8 (19.1)                            | 22.8 (18.8)                |                  |

**Abbreviations:** MOG, myelin oligodendrocyte glycoprotein; Ab, antibody; POS, positive; NEG: negative; ADEM, acute disseminated encephalomyelitis; TM, transverse myelitis; ESR, erythrocyte sedimentation rate; y, years; d, day; mo, months; CSF, cerebrospinal fluid, MRS, modified Rankin scale; FU, follow up; NIND, non-inflammatory neurological disorders; N/A, not applicable; N/M, not measured

# Normal CSF IgG/albumin = <10;

\* Age of CSF sampling

<sup>a</sup> p = 0.04

<sup>b</sup> p = 0.005, p value was calculated using Mann-Whitney test

doi:10.1371/journal.pone.0149411.t001

(p70), IFN- $\alpha$ , G-CSF and CCL11/Eotaxin. The 6-plex kit was used to detect IL-21, IL-23, CXCL13/BCA-1, CCL17/TARC, CCL21/6Ckine and CXCL12/SDF-1. The 3 Plex kit contained antibody-conjugated beads for CXCL9/MIG, CXCL11/I-TAC, and CCL19/MIP-3b. For each assay, the curve was derived from various concentrations of the cytokine standards assayed in the same manner as patient samples. All samples were measured undiluted. The methodological details including assay method, lower detection limits and coefficient of variance are available at the manufacturer’s website, “[www.merckmillipore.com](http://www.merckmillipore.com)”

### Enzyme-linked immunosorbent assay (ELISA)

APRIL (sensitivity <2pg/ml) and BAFF (sensitivity 0.4ng/ml) were performed using ELISA kits as per the manufacturer’s instructions (R&D Systems, Minneapolis, MN). All samples were analyzed undiluted except 6 samples, where volume was insufficient for BAFF analysis. In these cases, results were multiplied by the appropriate dilution factor.

### Statistical analysis

Statistical analysis was performed using R statistical programme and graphs were composed using Graph Pad Prism software version 6. We compared clinical and demographic features between MOG Ab POS and NEG groups using Mann-Whitney test. The CSF cytokine/chemokine data were analyzed to check for a normal distribution. As data did not show Gaussian distribution, statistical analyses of cytokine/chemokine levels were performed using Kruskal-Wallis test for multiple groups and Mann-Whitney test for two groups and 2 tailed p value was calculated. No adjustment was made for multiple group statistical comparisons, as this study was largely exploratory with an intention to study the immunopathological mechanisms based

on CSF cytokines/chemokines. The p-values from these analyses should be viewed as a measure of the strength of evidence for each association. We examined the correlations between cytokine/chemokine levels in the CSF and with disability score during admission and follow up by the Spearman rank correlation test. In the correlation analysis, p values <0.05 were considered to indicate statistical significance.

## Results

### Comparison of clinical and radiological features (MRI) between MOG Ab POS and MOG Ab NEG demyelination groups

The patients in MOG Ab POS and control group were younger compared to MOG Ab NEG group (median 4.7 vs 4.9 vs 9.3 years). The time to CSF sampling from onset of neurological symptoms was shorter in the MOG Ab NEG group compared to MOG Ab POS group (median 4 vs 6 days). The ESR was more commonly elevated in MOG Ab POS group. The CSF cell count (median 33 vs 17.5  $10^6$  /L), CSF neutrophils (median 5 vs 1  $10^6$  /L), CSF IgG (median 0.04 vs 0.025 g/L), and protein (median 0.42 vs 0.29 mg/dl) levels were higher in the MOG Ab POS CSF samples than in the MOG Ab NEG ([Table 1](#)). Recurrent relapses occurred in 2/10 of the MOG Ab POS patients, 8 month and 3 years after the initial events, whereas only 1/9 patient in the MOG Ab NEG group relapsed once within 2 months of the illness. There were no significant differences in disability outcome. The details on treatment and outcome are given in Table A in [S1 File](#).

The MRI brain in the MOG Ab POS group showed more extensive white matter involvement (mean supratentorial white matter score 3.2 vs 1.8), larger white matter lesion size, contrast enhancement of lesions, T1 hypointense lesions, optic nerve involvement, and more residual signal changes at follow up (FU) MRI compared to MOG Ab NEG group ([Fig 1](#) and [Table B in S1 File](#)).

### Comparison of CSF cytokine/chemokine levels between MOG Ab POS, MOG Ab NEG demyelination groups and controls

[Table 2](#) presents the median and ranges for all CSF cytokine/chemokines and statistical comparisons, presented according to Th1, Th2, Th17, Treg, B cell, and other cytokines/chemokines. 27 of the 34 measured CSF cytokines and chemokines were elevated in MOG Ab POS group compared to controls. Likewise, 24 of the 34 measured CSF cytokines/chemokines were elevated in MOG Ab NEG group compared to controls.

### Comparison of CSF cytokine/chemokine levels between MOG Ab POS and MOG Ab NEG groups ([Table 2](#))

**Th1 and Th2 related cytokines/chemokines.** There was no difference between serum MOG Ab POS and MOG Ab NEG groups for CSF Th1 and Th2 molecules, except for TNF- $\alpha$ .

**Th17 related cytokines and chemokines.** Two of the five CSF Th17 molecules (IL-6 and G-CSF) were elevated in the serum MOG Ab POS group compared to MOG Ab NEG group.

**B cell related cytokines and chemokines.** All five of the five measured CSF B cell associated cytokines/chemokine levels were elevated in serum MOG Ab POS group compared to MOG Ab NEG group (CXCL13, CXCL12, APRIL, BAFF and CCL19).

**Treg related cytokines and chemokines.** CSF IL-10 was elevated in MOG Ab POS group compared to MOG Ab NEG group.

**Other cytokines.** Of the 13 other CSF cytokines/chemokines measured, only IL-1ra levels were higher in serum MOG Ab POS group compared to MOG Ab NEG group.

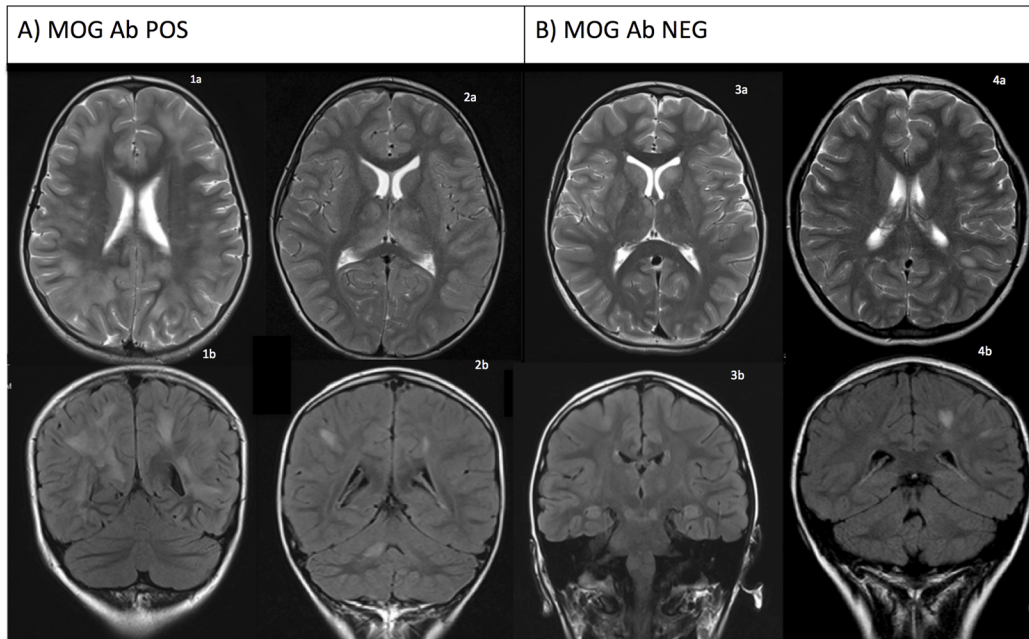

**Fig 1. Comparison of MRI brain radiological features in serum MOG Ab POS vs MOG Ab NEG demyelination group. A) MOG Ab POS group:** (a) T2 axial and (b) T2 FLAIR coronal views of case 1 show large subcortical demyelinating lesions. Case 2 shows confluent bilateral thalamic lesions and subcortical diffuse demyelinating lesions with hazy margins. **B) MOG Ab NEG group:** (a) T2 axial and (b) T2 FLAIR coronal views of case 3 show small multiple hyperintensities in putamina, head of caudate nuclei, thalami, midbrain, posterior pons, and medulla. Case 4 shows small well-defined demyelinating lesions in left subcortical white matter.

doi:10.1371/journal.pone.0149411.g001

The CSF cytokines/chemokines which were elevated ( $p < 0.05$ ) in serum MOG Ab POS compared to MOG Ab NEG are presented in Fig 2 according to T and B cell subsets, and all other molecules are presented in Fig 3. Serial cytokine/chemokines were performed during relapses in one patient with MOG Ab POS demyelination that showed persistent elevation of B cell related cytokines (CXCL13, CCL19 & APRIL), IL-6 and G-CSF even during relapses (data not shown).

### Comparison of CSF cytokine/chemokine levels in MOG Ab POS group based on CSF MOG Ab positivity (Fig 4)

Nine of the 10 serum MOG Ab POS patients had adequate CSF available for CSF MOG antibody testing. Four of these 9 samples were positive for CSF MOG Ab, and 5 were CSF MOG Ab negative. All 34 CSF cytokines and chemokine levels were compared, of which only median concentrations of B cell (CXCL13, CCL19, CXCL12) and Th17 (G-CSF, IL-17A) cytokines were higher ( $p < 0.05$ ) in CSF MOG Ab POS group compared to CSF MOG Ab NEG group (Fig 4).

### Correlation between CSF cytokines/chemokines and clinical parameters in patients with serum MOG Ab POS and MOG Ab NEG

There were no correlations of cytokines/chemokines with disability outcome using modified Rankin scale at admission and follow up. Most cytokine/chemokine levels decreased with longer duration of CSF sampling after onset of neurological symptoms. The majority of B cell cyto/chemokines correlated with each other and with Th17 molecules (IL-17A, IL-6 and

**Table 2. CSF cytokine/chemokine concentrations (median and range) in MOG Ab POS, MOG Ab NEG demyelination groups and controls according to T and B cell subsets.** This table shows predominant elevation of B cell and some of Th17 cytokines/chemokines in MOG Ab POS demyelination compared to MOG Ab NEG group.

| Cytokines/chemokines (pg/ml) | MOG Ab POS          | MOG Ab NEG           | Control             | MOG Ab POS vs Control | MOG Ab NEG vs Control | MOG Ab POS vs MOG Ab NEG |
|------------------------------|---------------------|----------------------|---------------------|-----------------------|-----------------------|--------------------------|
|                              | Median (range)      |                      |                     | p values              |                       |                          |
| <b>Th1</b>                   |                     |                      |                     |                       |                       |                          |
| IFN- $\gamma$                | 3.3 (0.6–16.70)     | 0 (0–63.9)           | 0 (0)               | <0.0001***            | 0.002**               | 0.1                      |
| TNF- $\alpha$                | 6 (1.7–7.1)         | 1 (1.2–2.9)          | 0 (0–0.1)           | <0.0001***            | <0.0001***            | 0.02*                    |
| CXCL9/MIG                    | 150.3 (53.7–551.6)  | 144 (25.7–680.3)     | 26.9 (13.4–143.7)   | <0.0001***            | 0.005**               | 0.37                     |
| IP-10/CXCL10                 | 2940.7 (646.5–8292) | 1425.2 (181.9–12070) | 666.2 (327.4–985.6) | 0.0003***             | 0.28                  | 0.25                     |
| CXCL11                       | 3.6 (0–11)          | 3.6 (0.4–23.5)       | 5.1 (0.4–8.2)       | 0.44                  | 0.89                  | 0.51                     |
| <b>Th2</b>                   |                     |                      |                     |                       |                       |                          |
| IL-2                         | 0.2 (0–4)           | 0 (0–17.1)           | 0.9 (0–2.9)         | 0.43                  | 0.07                  | 0.41                     |
| IL-4                         | 9.3 (5.4–25.3)      | 7.4 (0–55.1)         | 0 (0–23.7)          | <0.0001***            | 0.0003***             | 0.2                      |
| IL-13                        | 2.9 (2.3–9.4)       | 2.3 (0–12.1)         | 0 (0)               | <0.0001***            | <0.0001***            | 0.19                     |
| CCL17                        | 4.9 (1–22.7)        | 2.2 (0–20.9)         | 0.4 (0–2.2)         | <0.0001***            | 0.002**               | 0.18                     |
| Eotaxin                      | 0 (0–122.3)         | 0 (0–115.9)          | 0 (0)               | 0.04*                 | 0.008**               | 0.53                     |
| <b>Th17</b>                  |                     |                      |                     |                       |                       |                          |
| IL-6                         | 171 (5–745.4)       | 9.2 (1.5–19.5)       | 0.3 (0–5.6)         | <0.0001***            | 0.0004***             | 0.007**                  |
| G-CSF                        | 562.4 (25.4–7379)   | 34.2 (1.7–104)       | 15.4 (5.9–36.2)     | <0.0001***            | 0.89                  | 0.005**                  |
| GM-CSF                       | 2.4 (0.5–6)         | 0.5 (0.5–38)         | 0.2 (0–4.1)         | 0.006**               | 0.25                  | 0.05                     |
| IL-8                         | 254.3 (26.9–516.7)  | 129 (6.5–366.1)      | 32.4 (19.6–77.3)    | 0.0002***             | 0.003**               | 0.19                     |
| IL-17A                       | 1.6 (0–10.2)        | 0.2 (0–98)           | 0 (0)               | <0.0001***            | 0.0003***             | 0.08                     |
| IL-23                        | 10.1 (0–127.3)      | 10.1 (0–2276)        | 0 (0)               | <0.0001***            | 0.0003***             | 1                        |
| <b>B cell</b>                |                     |                      |                     |                       |                       |                          |
| MIP3b/CCL19                  | 1186.7 (305.4–2599) | 130.4 (82.40–1224)   | 108.8 (37.7–320.6)  | <0.0001***            | 0.047*                | 0.005**                  |
| APRIL                        | 5.9 (3–9.2)         | 2.6 (1.4–4.7)        | 3.06 (1.4–5.2)      | <0.0001***            | 0.31                  | 0.0009***                |
| BAFF                         | 368.3 (0–3029)      | 90.62 (0–366.4)      | 227.5 (142–647)     | 0.06                  | 0.01*                 | 0.01*                    |
| BCA.1/CXCL13                 | 329.8 (14.4–1000)   | 6.8 (0–89.5)         | 1.8 (0–8.4)         | <0.0001***            | 0.01*                 | 0.003**                  |
| CXCL12                       | 1746.3 (806.1–3701) | 1136 (542.1–2026)    | 1543.8 (981.5–3117) | 0.4                   | 0.01*                 | 0.04*                    |
| <b>T reg</b>                 |                     |                      |                     |                       |                       |                          |
| IL-10                        | 5.8 (0.8–10.5)      | 1.6 (0–12.5)         | 0 (0–1.3)           | <0.0001***            | <0.0001***            | 0.04*                    |
| <b>Others</b>                |                     |                      |                     |                       |                       |                          |
| X6Ckine/CCL21                | 0 (0–197.2)         | 0 (0–1457)           | 0 (0–64)            | 0.59                  | 0.16                  | 0.37                     |
| IL-21                        | 7.4 (0–12.4)        | 8.7 (0–36.8)         | 0 (0–6.5)           | <0.0001***            | 0.0004***             | 0.65                     |
| GRO/CXCL1                    | 138.1 (0–793.1)     | 40.7 (0–405.6)       | 0 (0–97.40)         | <0.0001***            | 0.004**               | 0.14                     |
| IFN- $\alpha$                | 27.2 (16.8–77.3)    | 19.5 (7.8–128.7)     | 0 (0–25.4)          | <0.0001***            | <0.0001***            | 0.18                     |
| IL-12 (p40)                  | 11.9 (4.9–38.4)     | 4.9 (0–129.0)        | 0 (0–26.1)          | 0.0003***             | 0.003**               | 0.19                     |
| IL-12 (p70)                  | 0 (0–12.3)          | 0 (0–28.4)           | 0.7 (0–5.1)         | 0.21                  | 0.01*                 | 0.42                     |
| IL-1ra                       | 61.5 (9.2–481.3)    | 10.2 (1.3–101.6)     | 3.3 (0–20.1)        | <0.0001***            | 0.046*                | 0.03*                    |
| IL-1 $\beta$                 | 1.1 (0–7.6)         | 0 (0–20.7)           | 0 (0–1.9)           | 0.0003***             | 0.29                  | 0.05                     |
| MCP-1/CCL2                   | 939.3 (403.8–1559)  | 528.5 (37.5–950)     | 995.2 (633–3238)    | 0.58                  | 0.0006***             | 0.06                     |
| MIP-1 $\alpha$ /CCL3         | 28.4 (0–90.9)       | 9.7 (0–44.8)         | 0 (0–22.7)          | 0.005**               | 0.18                  | 0.12                     |
| MIP-1 $\beta$ /CCL4          | 12.9 (7.7–37.1)     | 6.3 (2.9–53.4)       | 3.5 (0–17.3)        | 0.002**               | 0.06                  | 0.11                     |

(Continued)

Table 2. (Continued)

| Cytokines/chemokines (pg/ml) | MOG Ab POS     | MOG Ab NEG    | Control    | MOG Ab POS vs Control | MOG Ab NEG vs Control | MOG Ab POS vs MOG Ab NEG |
|------------------------------|----------------|---------------|------------|-----------------------|-----------------------|--------------------------|
|                              | Median (range) |               |            | p values              |                       |                          |
| RANTES                       | 18.7 (8–205.6) | 18 (0.5–97.3) | 0 (0–1800) | 0.0002***             | 0.003**               | 0.51                     |

**Abbreviations:** Th, T helper cell; Treg, Regulatory T cells; IL-, interleukin; IFN-, interferon; TNF, tumor necrosis factor; MIG, monokine induced by IFN- $\gamma$ ; IP, IFN- $\gamma$  inducible protein; G-CSF, granulocyte colony stimulating factor; MIP, macrophage inflammatory protein; GM-CSF, granulocyte monocyte colony stimulating factor; APRIL, A proliferation inducing ligand; BAFF, B cell activation factor; BCA-1, B cell attracting chemokine, GRO, melanoma growth-stimulating activity alpha; MCP, monocyte chemotactic protein; RANTES, regulated on activation normal T cell expressed and secreted.

p calculated using Kruskal-Wallis test.

\*P<0.05

\*\*P<0.01

\*\*\* P<0.001

doi:10.1371/journal.pone.0149411.t002

G-CSF) and IL-10, but did not show any relation with Th1 (except TNF- $\alpha$ ) and Th2 related cytokines/chemokines (presented as heat map in Fig 5).

## Discussion

Despite the increasingly available literature on MOG antibodies in CNS demyelination syndromes, the pathophysiology of the inflammatory processes underlying MOG antibody associated demyelination remains to be fully elucidated. This is the first study to report elevation of CSF cytokines and chemokines in MOG Ab-associated demyelination, and therefore investigate additional immunopathological aspects other than autoantibody-associated mechanisms.

We ensured that patient groups were clinically similar including a similar proportion of ADEM, and similar timing of CSF sampling. Although there were slightly larger numbers of ADEM patients in the MOG Ab POS group, the findings were similar when only ADEM patients were compared (data not shown). As previously reported, the serum MOG Ab POS patients in our cohort were younger at presentation, had higher systemic inflammatory markers (ESR), higher CSF cell count, CSF protein, CSF IgG levels, higher lesion load on MRI and more often had relapses and minor neurological deficits at follow-up which suggests that MOG Ab associated demyelination is a more inflammatory CNS syndrome than MOG Ab negative demyelination [2–4, 12, 25].

We investigated a comprehensive array of cytokines/chemokines in our patients with seropositive and seronegative MOG Ab associated demyelination. Although Th1 and Th2 cytokines were often elevated in both MOG Ab POS and MOG Ab NEG groups compared to controls, there was no significant difference between the serum MOG Ab POS and MOG Ab NEG groups except for TNF- $\alpha$ . Interestingly, TNF- $\alpha$  has been shown to be produced by both Th1 and Th17 cells in *in vitro* studies [26].

All of the measured CSF B cell associated chemo/cytokines (CCL19, CXCL13, CXCL12, BAFF, and APRIL) were higher in the serum MOG Ab POS group compared to MOG Ab NEG group. These chemo/cytokines play an important role in recruitment, clonal selection and expansion of B cells [27–31]. In addition, CXCL13 plays a role in the formation of ectopic lymphoid tissues and facilitates migration of Th 17 cells, whereas BAFF and APRIL are important for the development and survival of B cells [32–34]. CSF CXCL13, APRIL, and BAFF levels have been shown to be elevated in autoimmune disorders, including anti-NMDA receptor encephalitis, opsoclonus myoclonus ataxia syndrome, NMO, multiple sclerosis and optic



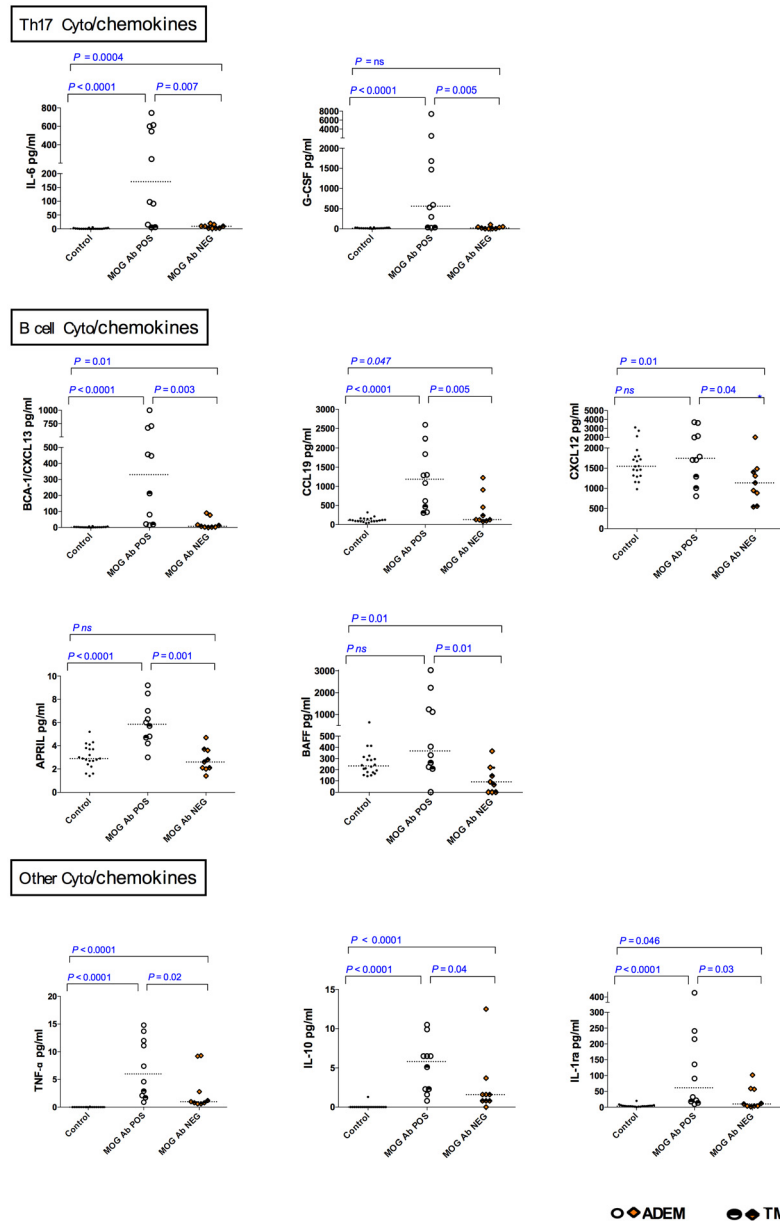

**Fig 2. CSF cytokine/chemokine concentrations in serum MOG Ab POS, serum MOG Ab NEG demyelination groups and controls according to T and B cell subsets.** Th17 (IL-6 & G-CSF), B cell related (CXCL13, CCL19, APRIL & BAFF) and other cytokines and chemokines (TNF- $\alpha$ , IL1ra and IL-10) were elevated in serum MOG Ab POS patients compared to serum MOG Ab NEG group ( $p < 0.05$ ). Dotted lines represent medians. The statistical analysis was performed using Kruskal Wallis test.

doi:10.1371/journal.pone.0149411.g002

neuritis. Previous studies reported that CSF CXCL13 correlates with intrathecal immunoglobulin production and presence of CSF plasma cells or plasmablasts better than any other B cell-attracting chemokines [35–39].

Th17 related cytokines/chemokines, predominantly IL-6 and G-CSF, were significantly elevated in serum MOG Ab POS group compared to MOG Ab NEG group. Recently IL-6 was reported to correlate with MOG antibody titers in paediatric patients with monophasic acquired demyelination syndromes [40]. IL-6 activates B cells and is dysregulated in a variety

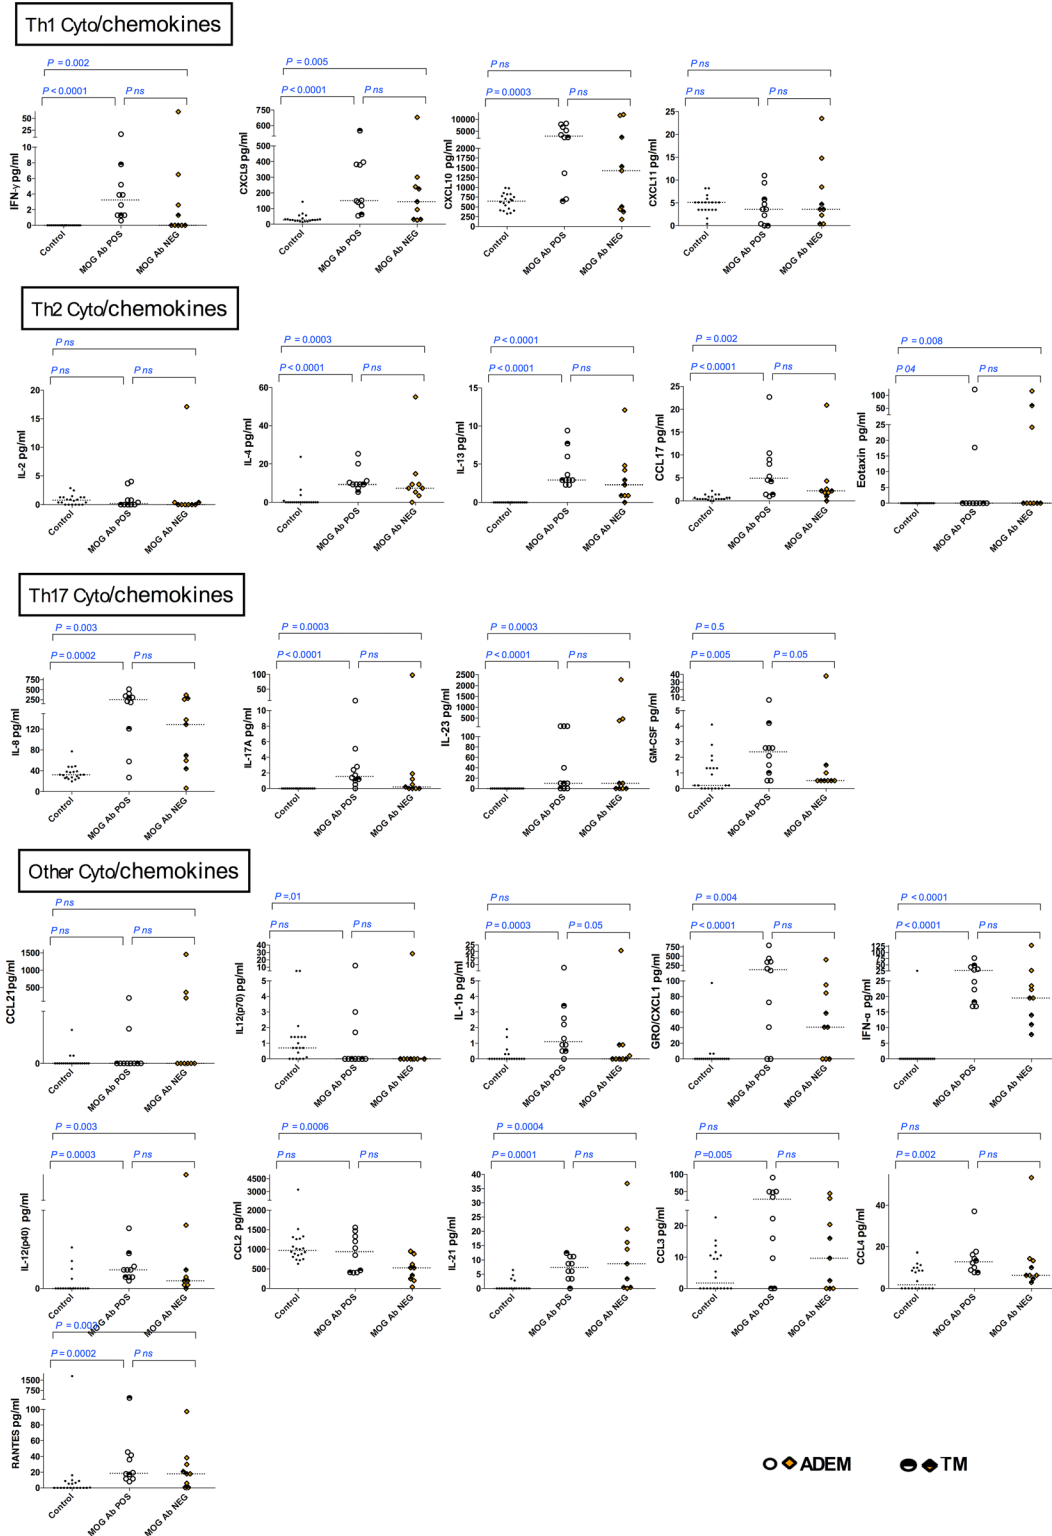

**Fig 3. CSF cytokine/chemokine concentrations in serum MOG Ab POS, serum MOG Ab NEG demyelination groups and controls, according to T and B cell subsets.** Cytokines and chemokines within Th1, Th2 and other CSF cytokine subgroups were not elevated in serum MOG Ab POS compared to serum MOG Ab NEG group. Dotted lines represent medians. The statistical analysis was performed using Kruskal Wallis test.

doi:10.1371/journal.pone.0149411.g003

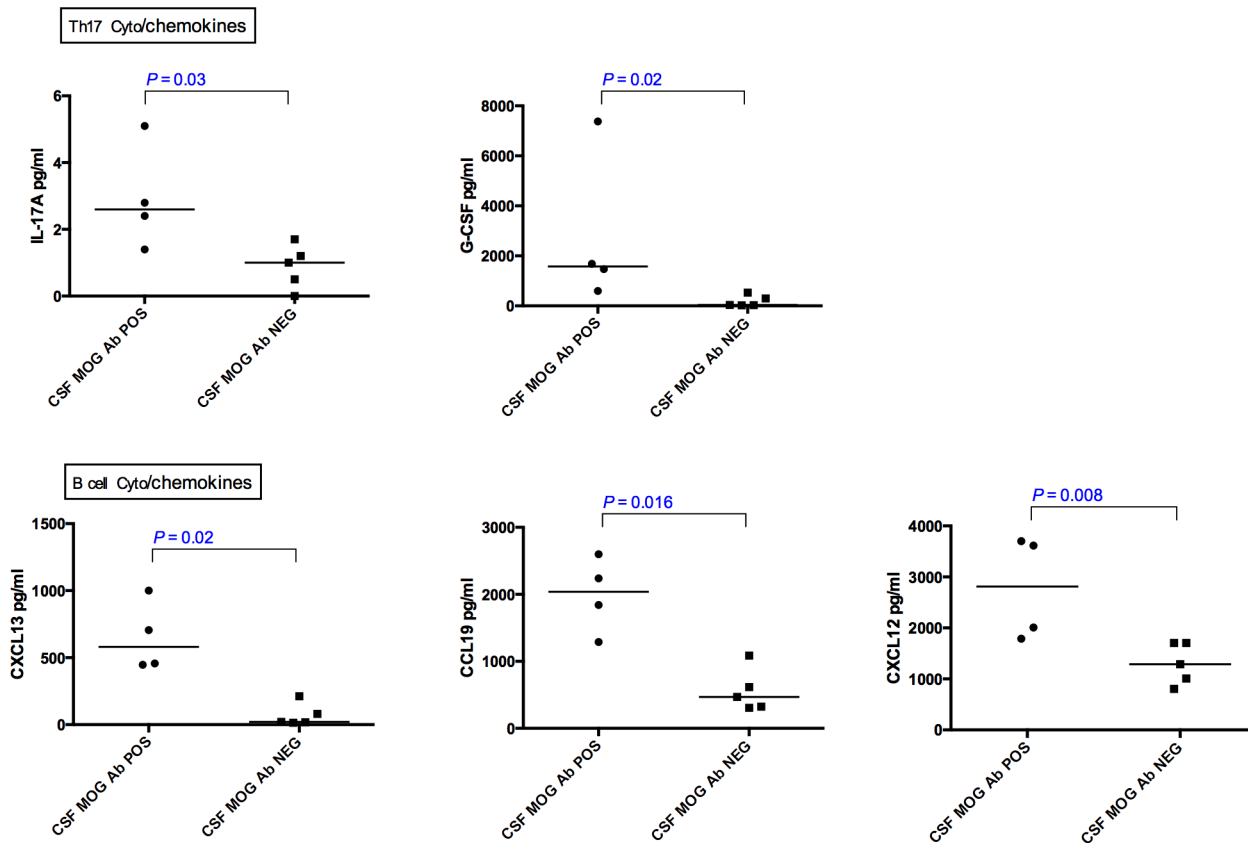

**Fig 4. CSF cytokine/chemokine concentrations in CSF MOG Ab POS patients and CSF MOG Ab NEG patients.** B cell (CXCL13, CCL19, CXCL12,) and Th17 (G-CSF, IL-17A) cytokines/chemokines were elevated in CSF MOG Ab POS patients when compared to CSF MOG Ab NEG patients ( $P < 0.05$ ). Dotted lines represent medians. The statistical analysis was performed using Man Whitney's test.

doi:10.1371/journal.pone.0149411.g004

of autoimmune disorders [41] including NMO [20] and ADEM [42]. In addition, IL-6 is a critical switch factor that diverts antigen activated naïve T cells towards proinflammatory Th17 cell lineage in the presence of TGF- $\beta$  and IL-23, which in turn aggravates inflammation by producing additional cytokines/chemokines [26]. Granulocyte colony-stimulating factor (G-CSF) production is induced by Th17 cells, which stimulate survival, proliferation, and differentiation of neutrophils [43, 44]. Although this data supports a possible role of Th17 immunity, in view of the pleiotropic nature of IL-6 and G-CSF it is possible that these cytokines are produced by cells other than Th17 cells. The persistent elevation of the cytokines/chemokines CXCL13, G-CSF, IL-6, APRIL, CCL19 during relapses in one patient with relapsing MOG Ab POS demyelination raises the possible utility of these markers in monitoring disease. The elevation of CSF IL-10 and IL-1ra in serum MOG Ab POS group compared to MOG Ab NEG group may suggest an *in vivo* regulatory response to counteract proinflammatory cytokines [45].

Even though there is emerging evidence that MOG antibody associated demyelination is an antibody-mediated disease, there is increasing evidence that active cooperation between Th17 and B cells against MOG antigen is necessary for immunopathogenicity, as shown in EAE mouse model studies [26, 46–48]. The correlation between different B cell cyto/chemokines and with Th17 molecules (IL-17A, IL-6 and G-CSF) and IL-10 observed in our study suggests possible interactions *in vivo* (Fig 5). Therefore it is likely that multiple inflammatory cell types play an important pathogenic role in MOG antibody associated demyelination, and our study

| T cell effector cells | CSF cyto/chemo kines | B cell |        |      |       |       |        |       |       |        |       | Th1   |              |              |       |       | Th2    |      |       |       |       | Treg/Th17/thers |         |      |       |       |                |            |            |       |        |      |      |      |        |
|-----------------------|----------------------|--------|--------|------|-------|-------|--------|-------|-------|--------|-------|-------|--------------|--------------|-------|-------|--------|------|-------|-------|-------|-----------------|---------|------|-------|-------|----------------|------------|------------|-------|--------|------|------|------|--------|
|                       |                      | CXCL13 | CXCL12 | BAFF | APRIL | CCL19 | IL-17A | IL-23 | G-CSF | GM-CSF | IL-6  | IL-8  | TNF $\alpha$ | IFN $\gamma$ | IP-10 | MIG   | CXCL11 | IL-2 | IL-4  | IL-13 | CCL17 | CCL21           | Eotaxin | IL10 | IL-21 | CXCL1 | IFN $\alpha$ 2 | IL-12(p40) | IL-12(p70) | IL-1b | IL-1ra | CCL2 | CCL3 | CCL4 | RANTES |
| B cell                | CXCL13               | 1.00   | 0.68   | 0.73 | 0.66  | 0.78  | 0.56   | 0.20  | 0.70  | 0.12   | 0.52  | 0.28  | 0.60         | -0.14        | 0.37  | 0.43  | 0.54   | 0.31 | -0.21 | -0.14 | 0.49  | 0.16            | -0.21   | 0.56 | -0.12 | 0.39  | 0.07           | 0.02       | -0.05      | 0.12  | 0.37   | 0.50 | 0.58 | 0.49 | 0.49   |
|                       | CXCL12               | 0.68   | 1.00   | 0.41 | 0.68  | 0.81  | 0.64   | 0.08  | 0.85  | 0.21   | 0.75  | 0.44  | 0.64         | -0.10        | 0.44  | 0.13  | 0.39   | 0.49 | 0.21  | -0.03 | 0.47  | 0.45            | 0.07    | 0.60 | 0.31  | 0.46  | 0.33           | 0.19       | 0.21       | 0.19  | 0.55   | 0.59 | 0.62 | 0.28 | 0.10   |
|                       | BAFF                 | 0.73   | 0.41   | 1.00 | 0.73  | 0.67  | 0.43   | 0.20  | 0.64  | 0.42   | 0.41  | 0.31  | 0.48         | 0.33         | 0.25  | 0.14  | 0.05   | 0.43 | 0.02  | 0.22  | 0.29  | 0.11            | 0.08    | 0.48 | 0.15  | 0.45  | 0.26           | 0.29       | 0.16       | 0.38  | 0.37   | 0.39 | 0.63 | 0.46 | 0.30   |
|                       | APRIL                | 0.66   | 0.68   | 0.73 | 1.00  | 0.73  | 0.47   | -0.03 | 0.82  | 0.57   | 0.49  | 0.48  | 0.60         | 0.23         | 0.31  | 0.25  | 0.23   | 0.51 | -0.13 | 0.24  | 0.21  | 0.21            | 0.16    | 0.64 | 0.34  | 0.60  | 0.42           | 0.34       | 0.29       | 0.52  | 0.56   | 0.42 | 0.57 | 0.35 | 0.30   |
|                       | MIP3b.CCL19          | 0.78   | 0.81   | 0.67 | 0.73  | 1.00  | 0.72   | 0.46  | 0.93  | 0.40   | 0.75  | 0.56  | 0.87         | 0.18         | 0.76  | 0.50  | 0.42   | 0.76 | 0.29  | 0.18  | 0.68  | 0.40            | 0.39    | 0.84 | 0.25  | 0.69  | 0.42           | 0.34       | 0.45       | 0.37  | 0.79   | 0.78 | 0.88 | 0.68 | 0.46   |
| Th17                  | IL-21                | -0.12  | 0.31   | 0.15 | 0.34  | 0.25  | 0.50   | 0.18  | 0.47  | 0.81   | 0.40  | 0.63  | 0.39         | 0.74         | 0.31  | -0.09 | -0.37  | 0.59 | 0.53  | 0.78  | 0.37  | 0.14            | 0.53    | 0.51 | 1.00  | 0.61  | 0.91           | 0.91       | 0.56       | 0.79  | 0.46   | 0.52 | 0.37 | 0.21 | 0.09   |
|                       | IL-17A               | 0.56   | 0.64   | 0.43 | 0.47  | 0.72  | 1.00   | 0.69  | 0.84  | 0.41   | 0.68  | 0.38  | 0.89         | 0.18         | 0.62  | 0.35  | -0.02  | 0.69 | 0.44  | 0.28  | 0.82  | 0.42            | 0.37    | 0.71 | 0.50  | 0.50  | 0.56           | 0.58       | 0.62       | 0.53  | 0.72   | 0.76 | 0.81 | 0.77 | 0.51   |
|                       | IL-23                | 0.20   | 0.08   | 0.20 | -0.03 | 0.46  | 0.69   | 1.00  | 0.42  | 0.24   | 0.40  | 0.23  | 0.72         | 0.27         | 0.75  | 0.53  | -0.06  | 0.63 | 0.55  | 0.25  | 0.81  | 0.23            | 0.63    | 0.50 | 0.18  | 0.33  | 0.33           | 0.42       | 0.69       | 0.39  | 0.67   | 0.65 | 0.73 | 0.84 | 0.52   |
|                       | G-CSF                | 0.70   | 0.85   | 0.64 | 0.82  | 0.93  | 0.84   | 0.42  | 1.00  | 0.52   | 0.79  | 0.56  | 0.90         | 0.22         | 0.66  | 0.36  | 0.21   | 0.78 | 0.30  | 0.26  | 0.66  | 0.40            | 0.39    | 0.82 | 0.47  | 0.68  | 0.55           | 0.49       | 0.57       | 0.54  | 0.83   | 0.75 | 0.88 | 0.66 | 0.40   |
|                       | GM-CSF               | 0.12   | 0.21   | 0.42 | 0.57  | 0.40  | 0.41   | 0.24  | 0.52  | 1.00   | 0.30  | 0.80  | 0.50         | 0.88         | 0.46  | 0.33  | -0.06  | 0.65 | 0.22  | 0.84  | 0.40  | -0.03           | 0.55    | 0.68 | 0.81  | 0.81  | 0.91           | 0.89       | 0.49       | 0.94  | 0.57   | 0.63 | 0.46 | 0.38 | 0.41   |
|                       | IL-6                 | 0.52   | 0.75   | 0.41 | 0.49  | 0.75  | 0.68   | 0.40  | 0.79  | 0.30   | 1.00  | 0.62  | 0.75         | 0.10         | 0.67  | 0.20  | 0.29   | 0.77 | 0.34  | 0.13  | 0.74  | -0.01           | 0.24    | 0.66 | 0.40  | 0.64  | 0.34           | 0.33       | 0.50       | 0.29  | 0.76   | 0.61 | 0.79 | 0.57 | 0.16   |
|                       | IL-8                 | 0.28   | 0.44   | 0.31 | 0.48  | 0.56  | 0.38   | 0.23  | 0.56  | 0.80   | 0.62  | 1.00  | 0.56         | 0.66         | 0.70  | 0.47  | 0.41   | 0.74 | 0.19  | 0.61  | 0.62  | -0.22           | 0.42    | 0.78 | 0.63  | 0.94  | 0.74           | 0.66       | 0.37       | 0.67  | 0.66   | 0.75 | 0.55 | 0.40 | 0.36   |
| Th1                   | TNF $\alpha$         | 0.60   | 0.64   | 0.48 | 0.60  | 0.87  | 0.89   | 0.72  | 0.90  | 0.50   | 0.75  | 0.56  | 1.00         | 0.25         | 0.85  | 0.62  | 0.23   | 0.86 | 0.34  | 0.31  | 0.85  | 0.30            | 0.54    | 0.87 | 0.39  | 0.70  | 0.54           | 0.53       | 0.72       | 0.57  | 0.93   | 0.82 | 0.92 | 0.88 | 0.63   |
|                       | IFN $\gamma$         | -0.14  | -0.10  | 0.33 | 0.23  | 0.18  | 0.18   | 0.27  | 0.22  | 0.88   | 0.10  | 0.66  | 0.25         | 1.00         | 0.37  | 0.17  | -0.27  | 0.56 | 0.41  | 0.93  | 0.28  | -0.08           | 0.63    | 0.49 | 0.74  | 0.68  | 0.83           | 0.86       | 0.45       | 0.77  | 0.36   | 0.48 | 0.31 | 0.30 | 0.29   |
|                       | IP-10                | 0.37   | 0.44   | 0.25 | 0.31  | 0.76  | 0.62   | 0.75  | 0.66  | 0.46   | 0.67  | 0.70  | 0.85         | 0.37         | 1.00  | 0.75  | 0.40   | 0.88 | 0.43  | 0.38  | 0.86  | 0.13            | 0.68    | 0.85 | 0.39  | 0.77  | 0.51           | 0.48       | 0.68       | 0.44  | 0.89   | 0.83 | 0.81 | 0.81 | 0.59   |
|                       | CXCL9                | 0.43   | 0.13   | 0.14 | 0.25  | 0.50  | 0.35   | 0.53  | 0.36  | 0.33   | 0.20  | 0.47  | 0.62         | 0.17         | 0.75  | 1.00  | 0.61   | 0.48 | -0.16 | 0.21  | 0.60  | -0.04           | 0.35    | 0.68 | -0.09 | 0.57  | 0.27           | 0.22       | 0.31       | 0.30  | 0.56   | 0.58 | 0.43 | 0.67 | 0.84   |
|                       | CXCL11               | 0.54   | 0.39   | 0.05 | 0.23  | 0.42  | -0.02  | -0.06 | 0.21  | -0.06  | 0.29  | 0.41  | 0.23         | -0.27        | 0.40  | 0.61  | 1.00   | 0.08 | -0.42 | -0.32 | 0.29  | -0.20           | -0.24   | 0.33 | -0.37 | 0.32  | -0.15          | -0.31      | -0.32      | -0.16 | 0.21   | 0.33 | 0.16 | 0.09 | 0.28   |
| Th2                   | IL-2                 | 0.31   | 0.49   | 0.43 | 0.51  | 0.76  | 0.69   | 0.63  | 0.78  | 0.65   | 0.77  | 0.74  | 0.86         | 0.56         | 0.88  | 0.48  | 0.08   | 1.00 | 0.53  | 0.61  | 0.76  | 0.12            | 0.75    | 0.89 | 0.59  | 0.87  | 0.68           | 0.70       | 0.84       | 0.60  | 0.91   | 0.75 | 0.84 | 0.80 | 0.49   |
|                       | IL-4                 | -0.21  | 0.21   | 0.02 | -0.13 | 0.29  | 0.44   | 0.55  | 0.30  | 0.22   | 0.34  | 0.19  | 0.34         | 0.41         | 0.43  | -0.16 | -0.42  | 0.53 | 1.00  | 0.40  | 0.42  | 0.53            | 0.71    | 0.26 | 0.53  | 0.21  | 0.47           | 0.50       | 0.61       | 0.25  | 0.41   | 0.47 | 0.48 | 0.30 | -0.12  |
|                       | IL-13                | -0.14  | -0.03  | 0.22 | 0.24  | 0.18  | 0.28   | 0.25  | 0.26  | 0.84   | 0.13  | 0.61  | 0.31         | 0.93         | 0.38  | 0.21  | -0.32  | 0.61 | 0.40  | 1.00  | 0.29  | -0.03           | 0.64    | 0.59 | 0.78  | 0.71  | 0.87           | 0.92       | 0.55       | 0.70  | 0.36   | 0.43 | 0.24 | 0.38 | 0.43   |
|                       | CCL17                | 0.49   | 0.47   | 0.29 | 0.21  | 0.68  | 0.82   | 0.81  | 0.66  | 0.40   | 0.74  | 0.62  | 0.85         | 0.28         | 0.86  | 0.60  | 0.29   | 0.76 | 0.42  | 0.29  | 1.00  | 0.07            | 0.42    | 0.76 | 0.37  | 0.65  | 0.50           | 0.52       | 0.55       | 0.46  | 0.77   | 0.86 | 0.81 | 0.81 | 0.58   |
|                       | CCL21                | 0.16   | 0.45   | 0.11 | 0.21  | 0.40  | 0.42   | 0.23  | 0.40  | -0.03  | -0.01 | -0.22 | 0.30         | -0.08        | 0.13  | -0.04 | -0.20  | 0.12 | 0.53  | -0.03 | 0.07  | 1.00            | 0.36    | 0.16 | 0.14  | -0.11 | 0.21           | 0.12       | 0.26       | 0.07  | 0.21   | 0.32 | 0.30 | 0.11 | -0.01  |
|                       | Eotaxin              | -0.21  | 0.07   | 0.08 | 0.16  | 0.39  | 0.37   | 0.63  | 0.39  | 0.55   | 0.24  | 0.42  | 0.54         | 0.63         | 0.68  | 0.35  | -0.24  | 0.75 | 0.71  | 0.64  | 0.42  | 0.36            | 1.00    | 0.55 | 0.53  | 0.53  | 0.62           | 0.64       | 0.86       | 0.55  | 0.70   | 0.53 | 0.55 | 0.55 | 0.29   |
| Treg                  | IL10                 | 0.56   | 0.60   | 0.48 | 0.64  | 0.84  | 0.71   | 0.50  | 0.82  | 0.68   | 0.66  | 0.78  | 0.87         | 0.49         | 0.85  | 0.68  | 0.33   | 0.89 | 0.26  | 0.59  | 0.76  | 0.16            | 0.55    | 1.00 | 0.51  | 0.92  | 0.72           | 0.68       | 0.61       | 0.59  | 0.82   | 0.82 | 0.75 | 0.78 | 0.73   |
| Others                | CXCL1                | 0.39   | 0.46   | 0.45 | 0.60  | 0.69  | 0.50   | 0.33  | 0.68  | 0.81   | 0.64  | 0.94  | 0.70         | 0.68         | 0.77  | 0.57  | 0.32   | 0.87 | 0.21  | 0.71  | 0.65  | -0.11           | 0.53    | 0.92 | 0.61  | 1.00  | 0.77           | 0.73       | 0.53       | 0.66  | 0.74   | 0.74 | 0.63 | 0.61 | 0.57   |
|                       | IFN $\alpha$ 2       | 0.07   | 0.33   | 0.26 | 0.42  | 0.42  | 0.56   | 0.33  | 0.55  | 0.91   | 0.34  | 0.74  | 0.54         | 0.83         | 0.51  | 0.27  | -0.15  | 0.68 | 0.47  | 0.87  | 0.50  | 0.21            | 0.62    | 0.72 | 0.91  | 0.77  | 1.00           | 0.97       | 0.56       | 0.85  | 0.55   | 0.72 | 0.46 | 0.41 | 0.41   |
|                       | IL-12(p40)           | 0.02   | 0.19   | 0.29 | 0.34  | 0.34  | 0.58   | 0.42  | 0.49  | 0.89   | 0.33  | 0.66  | 0.53         | 0.86         | 0.48  | 0.22  | -0.31  | 0.70 | 0.50  | 0.92  | 0.52  | 0.12            | 0.64    | 0.68 | 0.91  | 0.73  | 0.97           | 1.00       | 0.63       | 0.85  | 0.53   | 0.64 | 0.47 | 0.49 | 0.44   |
|                       | IL-12(p70)           | -0.05  | 0.21   | 0.16 | 0.29  | 0.45  | 0.62   | 0.69  | 0.57  | 0.49   | 0.50  | 0.37  | 0.72         | 0.45         | 0.68  | 0.31  | -0.32  | 0.84 | 0.61  | 0.55  | 0.55  | 0.26            | 0.86    | 0.61 | 0.56  | 0.53  | 0.56           | 0.63       | 1.00       | 0.55  | 0.81   | 0.47 | 0.67 | 0.73 | 0.37   |
|                       | IL-1b                | 0.12   | 0.19   | 0.38 | 0.52  | 0.37  | 0.53   | 0.39  | 0.54  | 0.94   | 0.29  | 0.67  | 0.57         | 0.77         | 0.44  | 0.30  | -0.16  | 0.60 | 0.25  | 0.70  | 0.46  | 0.07            | 0.55    | 0.59 | 0.79  | 0.66  | 0.85           | 0.85       | 0.55       | 1.00  | 0.62   | 0.65 | 0.54 | 0.41 | 0.36   |
|                       | IL-1ra               | 0.37   | 0.55   | 0.37 | 0.56  | 0.79  | 0.72   | 0.67  | 0.83  | 0.57   | 0.76  | 0.66  | 0.93         | 0.36         | 0.89  | 0.56  | 0.21   | 0.91 | 0.41  | 0.36  | 0.77  | 0.21            | 0.70    | 0.82 | 0.46  | 0.74  | 0.55           | 0.53       | 0.81       | 0.62  | 1.00   | 0.77 | 0.90 | 0.77 | 0.44   |
|                       | CCL2                 | 0.50   | 0.59   | 0.39 | 0.42  | 0.78  | 0.76   | 0.65  | 0.75  | 0.63   | 0.61  | 0.75  | 0.82         | 0.48         | 0.83  | 0.58  | 0.33   | 0.75 | 0.47  | 0.43  | 0.86  | 0.32            | 0.53    | 0.82 | 0.52  | 0.74  | 0.72           | 0.64       | 0.47       | 0.65  | 0.77   | 1.00 | 0.81 | 0.64 | 0.50   |
|                       | CCL3                 | 0.58   | 0.62   | 0.63 | 0.57  | 0.88  | 0.81   | 0.73  | 0.88  | 0.46   | 0.79  | 0.55  | 0.92         | 0.31         | 0.81  | 0.43  | 0.16   | 0.84 | 0.48  | 0.24  | 0.81  | 0.30            | 0.55    | 0.75 | 0.37  | 0.63  | 0.46           | 0.47       | 0.67       | 0.54  | 0.90   | 0.81 | 1.00 | 0.79 | 0.38   |
|                       | CCL4                 | 0.49   | 0.28   | 0.46 | 0.35  | 0.68  | 0.77   | 0.84  | 0.66  | 0.38   | 0.57  | 0.40  | 0.88         | 0.30         | 0.81  | 0.67  | 0.09   | 0.80 | 0.30  | 0.38  | 0.81  | 0.11            | 0.55    | 0.78 | 0.21  | 0.61  | 0.41           | 0.49       | 0.73       | 0.41  | 0.77   | 0.64 | 0.79 | 1.00 | 0.79   |
|                       | RANTES               | 0.49   | 0.10   | 0.30 | 0.30  | 0.46  | 0.51   | 0.52  | 0.40  | 0.41   | 0.16  | 0.36  | 0.63         | 0.29         | 0.59  | 0.84  | 0.28   | 0.49 | -0.12 | 0.43  | 0.58  | -0.01           | 0.29    | 0.73 | 0.09  | 0.57  | 0.41           | 0.44       | 0.37       | 0.36  | 0.44   | 0.50 | 0.38 | 0.79 | 1.00   |

**Fig 5. Correlation between CSF cytokine and chemokine levels in patients with MOG Ab POS demyelination.** This figure shows that the majority of B cell cyto/chemokines correlate with each other and with Th17 molecules (IL-17A, IL-6 and G-CSF) and IL-10, but do not show any association with Th1 (except TNF- $\alpha$ ) and Th2 related cytokines/chemokines. The above heat map is graded based on Spearman rank correlation\* 0.0 to 0.03, negligible correlation; 0.3 to 0.5, low positive correlation; 0.50 to 0.70, moderate correlation; 0.70 to 0.90, high correlation; 0.9 to 1, very high correlation). \*The negative correlations were all moderate or weaker so have been coded the same as the “negligible” correlations.

doi:10.1371/journal.pone.0149411.g005

has suggested that MOG associated demyelination is immunopathologically complex. The predominant elevation of CSF B cell and some Th17 and neutrophil related cytokines/chemokines in serum and CSF MOG Ab positive demyelination is similar to what has been described in NMO [18, 20, 49, 50]. To date there are no cytokine/chemokine studies in adults with MOG

Ab POS demyelination syndromes. In view of different clinical associations, it is possible that adult patients with MOG Ab may have a different cytokine profile to children.

Even though earlier studies showed no differences between outcomes between MOG Ab POS and NEG cases, we are increasingly learning about MOG Ab POS cases that have relapses and long-term neurological sequelae [5, 7, 9, 10]. In our series MOG Ab POS cases had a higher lesion load on MRI, and more often had relapses and deficits on follow up. Overall, our findings have important clinical implications in order to optimize patients' treatment. For example, IL-6 may have some roles in the pathogenesis of MOG Ab demyelination and the anti-IL-6 pathway could be a promising target for new pharmacological treatments of steroid resistant MOG Ab associated demyelination, as has recently been shown in NMO [51]. Due to the predominant humoral pathogenic mechanisms, it seems rationale to treat MOG antibody associated demyelination with immune suppression including steroids, plasma exchange, or a B-cell-directed therapy, similar to NMO [52, 53]. However it is possible that different patients may have different dominant immunopathogenic mechanisms leading to variability in therapeutic response.

The limitations of our study are the fact our MOG Ab POS and NEG groups were not identical in clinical and demographic parameters, despite our efforts to balance our cohorts according to demyelination phenotype. The sample size was small in each group and the current study was confined to the paediatric group only. Our control group aimed to generate normative data by using non-inflammatory neurological controls and future studies should compare demyelination syndromes with infectious and autoimmune encephalitis. The storage of samples for prolonged periods can result in theoretical degradation of cytokines/chemokines, although we did not clearly observe that (data not shown). And finally, we could not perform comparisons between serum and CSF samples to determine whether the cytokine/chemokines are predominantly produced intrathecally or peripherally, due to the lack of available stored frozen serum samples.

In summary, our study points to a role of predominant humoral immunity and possible role of Th17 cells and neutrophils in MOG antibody associated demyelination, which strengthens the hypothesis that MOG antibody defines a separate immunopathological syndrome with dominant humoral autoimmunity.

## Supporting Information

**S1 File.** Table A. Details of clinical syndrome, treatment and outcome of MOG Ab POS and NEG patients with acute demyelination episode. Table B. Comparison of radiological abnormalities between MOG Ab POS and MOG Ab NEG demyelination groups. (DOCX)

## Acknowledgments

Elizabeth Barnes and Dr Rajeshwar Reddy Angiti helped with statistical analysis. This work was supported by scholarship from Petre Foundation, Australian Postgraduate award, and Multiple Sclerosis Research Australia.

## Author Contributions

Conceived and designed the experiments: KK RD LW FB. Performed the experiments: KK LW FT FB SR. Analyzed the data: KK RD. Contributed reagents/materials/analysis tools: ET SB JE. Wrote the paper: KK RCD KP. Radiological phenotyping: KP.

## References

1. Carotenuto A, D'Ursi AM, Nardi E, Papini AM, Rovero P. Conformational analysis of a glycosylated human myelin oligodendrocyte glycoprotein peptide epitope able to detect antibody response in multiple sclerosis. *Journal of medicinal chemistry*. 2001; 44(14):2378–81. PMID: [11428934](#)
2. Dale RC, Tantsis EM, Merheb V, Kumaran RY, Sinmaz N, Pathmanandavel K, et al. Antibodies to MOG have a demyelination phenotype and affect oligodendrocyte cytoskeleton. *Neurology(R) neuroimmunology & neuroinflammation*. 2014; 1(1):e12.
3. Reindl M, Di Pauli F, Rostasy K, Berger T. The spectrum of MOG autoantibody-associated demyelinating diseases. *Nature reviews Neurology*. 2013; 9(8):455–61. doi: [10.1038/nrneurol.2013.118](#) PMID: [23797245](#)
4. Brilot F, Dale RC, Selter RC, Grummel V, Kalluri SR, Aslam M, et al. Antibodies to native myelin oligodendrocyte glycoprotein in children with inflammatory demyelinating central nervous system disease. *Annals of neurology*. 2009; 66(6):833–42. doi: [10.1002/ana.21916](#) PMID: [20033986](#)
5. Kitley J, Woodhall M, Waters P, Leite MI, Devenney E, Craig J, et al. Myelin-oligodendrocyte glycoprotein antibodies in adults with a neuromyelitis optica phenotype. *Neurology*. 2012; 79(12):1273–7. doi: [10.1212/WNL.0b013e31826aac4e](#) PMID: [22914827](#)
6. Sato DK, Callegaro D, Lana-Peixoto MA, Waters PJ, de Haidar Jorge FM, Takahashi T, et al. Distinction between MOG antibody-positive and AQP4 antibody-positive NMO spectrum disorders. *Neurology*. 2014; 82(6):474–81. doi: [10.1212/WNL.000000000000101](#) PMID: [24415568](#)
7. Ramanathan S, Reddel SW, Henderson A, Parratt JD, Barnett M, Gatt PN, et al. Antibodies to myelin oligodendrocyte glycoprotein in bilateral and recurrent optic neuritis. *Neurology(R) neuroimmunology & neuroinflammation*. 2014; 1(4):e40.
8. Hoffberger R, Sepulveda M, Armangue T, Blanco Y, Rostasy K, Cobo Calvo A, et al. Antibodies to MOG and AQP4 in adults with neuromyelitis optica and suspected limited forms of the disease. *Multiple sclerosis (Houndmills, Basingstoke, England)*. 2015; 21(7):866–74.
9. Probstel AK, Dornmair K, Bittner R, Sperl P, Jenne D, Magalhaes S, et al. Antibodies to MOG are transient in childhood acute disseminated encephalomyelitis. *Neurology*. 2011; 77(6):580–8. doi: [10.1212/WNL.0b013e318228c0b1](#) PMID: [21795651](#)
10. Rostasy K, Mader S, Schanda K, Huppke P, Gartner J, Kraus V, et al. Anti-myelin oligodendrocyte glycoprotein antibodies in pediatric patients with optic neuritis. *Archives of neurology*. 2012; 69(6):752–6. doi: [10.1001/archneuro.2011.2956](#) PMID: [22371853](#)
11. Hacohen Y, Absoud M, Deiva K, Hemingway C, Nytrova P, Woodhall M, et al. Myelin oligodendrocyte glycoprotein antibodies are associated with a non-MS course in children. *Neurology(R) neuroimmunology & neuroinflammation*. 2015; 2(2):e81.
12. Ketelslegers IA, Van Pelt DE, Bryde S, Neuteboom RF, Catsman-Berrevoets CE, Hamann D, et al. Anti-MOG antibodies plead against MS diagnosis in an Acquired Demyelinating Syndromes cohort. *Multiple sclerosis (Houndmills, Basingstoke, England)*. 2015.
13. Marta CB, Taylor CM, Coetzee T, Kim T, Winkler S, Bansal R, et al. Antibody cross-linking of myelin oligodendrocyte glycoprotein leads to its rapid repartitioning into detergent-insoluble fractions, and altered protein phosphorylation and cell morphology. *The Journal of neuroscience: the official journal of the Society for Neuroscience*. 2003; 23(13):5461–71.
14. Mader S, Gredler V, Schanda K, Rostasy K, Dujmovic I, Pfaller K, et al. Complement activating antibodies to myelin oligodendrocyte glycoprotein in neuromyelitis optica and related disorders. *Journal of neuroinflammation*. 2011; 8:184. doi: [10.1186/1742-2094-8-184](#) PMID: [22204662](#)
15. Piddlesden SJ, Lassmann H, Zimprich F, Morgan BP, Lington C. The demyelinating potential of antibodies to myelin oligodendrocyte glycoprotein is related to their ability to fix complement. *The American journal of pathology*. 1993; 143(2):555–64. PMID: [7688186](#)
16. Mayer MC, Meinl E. Glycoproteins as targets of autoantibodies in CNS inflammation: MOG and more. *Therapeutic advances in neurological disorders*. 2012; 5(3):147–59. doi: [10.1177/1756285611433772](#)
17. Jarius S, Wildemann B, Paul F. Neuromyelitis optica: clinical features, immunopathogenesis and treatment. *Clinical and experimental immunology*. 2014; 176(2):149–64. doi: [10.1111/cei.12271](#)
18. Lucchinetti CF, Mandler RN, McGavern D, Bruck W, Gleich G, Ransohoff RM, et al. A role for humoral mechanisms in the pathogenesis of Devic's neuromyelitis optica. *Brain: a journal of neurology*. 2002; 125(Pt 7):1450–61.
19. Mitsdoerffer M, Kuchroo V, Korn T. Immunology of neuromyelitis optica: a T cell-B cell collaboration. *Ann N Y Acad Sci*. 2013; 1283:57–66. doi: [10.1111/nyas.12118](#) PMID: [23617588](#)
20. Uzawa A, Mori M, Arai K, Sato Y, Hayakawa S, Masuda S, et al. Cytokine and chemokine profiles in neuromyelitis optica: significance of interleukin-6. *Multiple sclerosis (Houndmills, Basingstoke, England)*. 2010; 16(12):1443–52.

21. Peter Delves J., Martin SJ, Burton DR, Roitt IM. *Roitt's Essential Immunology*. 12th Edition ed: Wiley-Blackwell; 2011.
22. Akdis M, Burgler S, Cramer R, Eiwegger T, Fujita H, Gomez E, et al. Interleukins, from 1 to 37, and interferon-gamma: receptors, functions, and roles in diseases. *The Journal of allergy and clinical immunology*. 2011; 127(3):701–21 e1–70. doi: [10.1016/j.jaci.2010.11.050](https://doi.org/10.1016/j.jaci.2010.11.050) PMID: [21377040](https://pubmed.ncbi.nlm.nih.gov/21377040/)
23. Zlotnik A, Yoshie O. The chemokine superfamily revisited. *Immunity*. 2012; 36(5):705–16. doi: [10.1016/j.immuni.2012.05.008](https://doi.org/10.1016/j.immuni.2012.05.008) PMID: [22633458](https://pubmed.ncbi.nlm.nih.gov/22633458/)
24. Krupp LB, Tardieu M, Amato MP, Banwell B, Chitnis T, Dale RC, et al. International Pediatric Multiple Sclerosis Study Group criteria for pediatric multiple sclerosis and immune-mediated central nervous system demyelinating disorders: revisions to the 2007 definitions. *Multiple sclerosis (Houndmills, Basingstoke, England)*. 2013; 19(10):1261–7.
25. Baumann M, Sahin K, Lechner C, Hennes EM, Schanda K, Mader S, et al. Clinical and neuroradiological differences of paediatric acute disseminating encephalomyelitis with and without antibodies to the myelin oligodendrocyte glycoprotein. *Journal of neurology, neurosurgery, and psychiatry*. 2015; 86(3):265–72. doi: [10.1136/jnnp-2014-308346](https://doi.org/10.1136/jnnp-2014-308346) PMID: [25121570](https://pubmed.ncbi.nlm.nih.gov/25121570/)
26. Langrish CL, Chen Y, Blumenschein WM, Mattson J, Basham B, Sedgwick JD, et al. IL-23 drives a pathogenic T cell population that induces autoimmune inflammation. *The Journal of experimental medicine*. 2005; 201(2):233–40. PMID: [15657292](https://pubmed.ncbi.nlm.nih.gov/15657292/)
27. Brandes M, Legler DF, Spoerri B, Schaerli P, Moser B. Activation-dependent modulation of B lymphocyte migration to chemokines. *International immunology*. 2000; 12(9):1285–92. PMID: [10967023](https://pubmed.ncbi.nlm.nih.gov/10967023/)
28. Aloisi F, Columba-Cabezas S, Franciotta D, Rosicarelli B, Magliozzi R, Reynolds R, et al. Lymphoid chemokines in chronic neuroinflammation. *Journal of neuroimmunology*. 2008; 198(1–2):106–12. doi: [10.1016/j.jneuroim.2008.04.025](https://doi.org/10.1016/j.jneuroim.2008.04.025) PMID: [18539341](https://pubmed.ncbi.nlm.nih.gov/18539341/)
29. Gunn MD, Ngo VN, Ansel KM, Ekland EH, Cyster JG, Williams LT. A B-cell-homing chemokine made in lymphoid follicles activates Burkitt's lymphoma receptor-1. *Nature*. 1998; 391(6669):799–803. PMID: [9486651](https://pubmed.ncbi.nlm.nih.gov/9486651/)
30. Chevalier N, Jarrossay D, Ho E, Avery DT, Ma CS, Yu D, et al. CXCR5 expressing human central memory CD4 T cells and their relevance for humoral immune responses. *Journal of immunology (Baltimore, Md: 1950)*. 2011; 186(10):5556–68.
31. Pashenkov M, Soderstrom M, Link H. Secondary lymphoid organ chemokines are elevated in the cerebrospinal fluid during central nervous system inflammation. *Journal of neuroimmunology*. 2003; 135(1–2):154–60. PMID: [12576236](https://pubmed.ncbi.nlm.nih.gov/12576236/)
32. Serafini B, Rosicarelli B, Magliozzi R, Stigliano E, Aloisi F. Detection of ectopic B-cell follicles with germinal centers in the meninges of patients with secondary progressive multiple sclerosis. *Brain pathology*. 2004; 14(2):164–74. PMID: [15193029](https://pubmed.ncbi.nlm.nih.gov/15193029/)
33. Schneider P. The role of APRIL and BAFF in lymphocyte activation. *Current opinion in immunology*. 2005; 17(3):282–9. PMID: [15886118](https://pubmed.ncbi.nlm.nih.gov/15886118/)
34. Takagi R, Higashi T, Hashimoto K, Nakano K, Mizuno Y, Okazaki Y, et al. B cell chemoattractant CXCL13 is preferentially expressed by human Th17 cell clones. *Journal of immunology (Baltimore, Md: 1950)*. 2008; 181(1):186–9.
35. Leypoldt F, Hoftberger R, Titulaer MJ, Armangue T, Gresa-Arribas N, Jahn H, et al. Investigations on CXCL13 in Anti-N-Methyl-D-Aspartate Receptor Encephalitis: A Potential Biomarker of Treatment Response. *JAMA Neurol*. 2014.
36. Pranzatelli MR, Tate ED, McGee NR, Colliver JA. Cytokines, cytokine antagonists, and soluble adhesion molecules in pediatric OMS and other neuroinflammatory disorders. *Journal of the neurological sciences*. 2013; 326(1–2):53–8. doi: [10.1016/j.jns.2013.01.011](https://doi.org/10.1016/j.jns.2013.01.011) PMID: [23380454](https://pubmed.ncbi.nlm.nih.gov/23380454/)
37. Kowarik MC, Cepok S, Sellner J, Grummel V, Weber MS, Korn T, et al. CXCL13 is the major determinant for B cell recruitment to the CSF during neuroinflammation. *Journal of neuroinflammation*. 2012; 9:93. doi: [10.1186/1742-2094-9-93](https://doi.org/10.1186/1742-2094-9-93) PMID: [22591862](https://pubmed.ncbi.nlm.nih.gov/22591862/)
38. Zhong X, Wang H, Dai Y, Wu A, Bao J, Xu W, et al. Cerebrospinal fluid levels of CXCL13 are elevated in neuromyelitis optica. *Journal of neuroimmunology*. 2011; 240–241:104–8. doi: [10.1016/j.jneuroim.2011.10.001](https://doi.org/10.1016/j.jneuroim.2011.10.001) PMID: [22036953](https://pubmed.ncbi.nlm.nih.gov/22036953/)
39. Khademi M, Kockum I, Andersson ML, Iacobaeus E, Brundin L, Sellebjerg F, et al. Cerebrospinal fluid CXCL13 in multiple sclerosis: a suggestive prognostic marker for the disease course. *Multiple sclerosis (Houndmills, Basingstoke, England)*. 2011; 17(3):335–43.
40. Horellou P, Wang M, Keo V, Chretien P, Serguera C, Waters P, et al. Increased interleukin-6 correlates with myelin oligodendrocyte glycoprotein antibodies in pediatric monophasic demyelinating diseases and multiple sclerosis. *Journal of neuroimmunology*. 2015; 289:1–7. doi: [10.1016/j.jneuroim.2015.10.002](https://doi.org/10.1016/j.jneuroim.2015.10.002) PMID: [26616865](https://pubmed.ncbi.nlm.nih.gov/26616865/)

41. Neurath MF, Finotto S. IL-6 signaling in autoimmunity, chronic inflammation and inflammation-associated cancer. *Cytokine & growth factor reviews*. 2011; 22(2):83–9.
42. Dale RC, Morovat A. Interleukin-6 and oligoclonal IgG synthesis in children with acute disseminated encephalomyelitis. *Neuropediatrics*. 2003; 34(3):141–5. PMID: [12910437](#)
43. Fossiez F, Djossou O, Chomarat P, Flores-Romo L, Ait-Yahia S, Maat C, et al. T cell interleukin-17 induces stromal cells to produce proinflammatory and hematopoietic cytokines. *The Journal of experimental medicine*. 1996; 183(6):2593–603. PMID: [8676080](#)
44. Forlow SB, Schurr JR, Kolls JK, Bagby GJ, Schwarzenberger PO, Ley K. Increased granulopoiesis through interleukin-17 and granulocyte colony-stimulating factor in leukocyte adhesion molecule-deficient mice. *Blood*. 2001; 98(12):3309–14. PMID: [11719368](#)
45. de Waal Malefyt R, Abrams J, Bennett B, Figdor CG, de Vries JE. Interleukin 10(IL-10) inhibits cytokine synthesis by human monocytes: an autoregulatory role of IL-10 produced by monocytes. *The Journal of experimental medicine*. 1991; 174(5):1209–20. PMID: [1940799](#)
46. Bettelli E, Baeten D, Jager A, Sobel RA, Kuchroo VK. Myelin oligodendrocyte glycoprotein-specific T and B cells cooperate to induce a Devic-like disease in mice. *The Journal of clinical investigation*. 2006; 116(9):2393–402. PMID: [16955141](#)
47. Patakas A, Benson RA, Withers DR, Conigliaro P, McInnes IB, Brewer JM, et al. Th17 effector cells support B cell responses outside of germinal centres. *PloS one*. 2012; 7(11):e49715. doi: [10.1371/journal.pone.0049715](#) PMID: [23166752](#)
48. Mitsdoerffer M, Lee Y, Jager A, Kim HJ, Korn T, Kolls JK, et al. Proinflammatory T helper type 17 cells are effective B-cell helpers. *Proceedings of the National Academy of Sciences of the United States of America*. 2010; 107(32):14292–7. doi: [10.1073/pnas.1009234107](#) PMID: [20660725](#)
49. Michael BD, Elson L, Griffiths MJ, Faragher B, Borrow R, Solomon T, et al. Post-acute serum eosinophil and neutrophil-associated cytokine/chemokine profile can distinguish between patients with neuromyelitis optica and multiple sclerosis; and identifies potential pathophysiological mechanisms—a pilot study. *Cytokine*. 2013; 64(1):90–6. doi: [10.1016/j.cyto.2013.07.019](#) PMID: [23941778](#)
50. Uzawa A, Mori M, Kuwabara S. Cytokines and chemokines in neuromyelitis optica: pathogenetic and therapeutic implications. *Brain pathology*. 2014; 24(1):67–73. doi: [10.1111/bpa.12097](#) PMID: [24345220](#)
51. Araki M, Aranami T, Matsuoka T, Nakamura M, Miyake S, Yamamura T. Clinical improvement in a patient with neuromyelitis optica following therapy with the anti-IL-6 receptor monoclonal antibody tocilizumab. *Mod Rheumatol*. 2013; 23(4):827–31. doi: [10.1007/s10165-012-0715-9](#) PMID: [22782533](#)
52. Kim SH, Huh SY, Lee SJ, Joung A, Kim HJ. A 5-year follow-up of rituximab treatment in patients with neuromyelitis optica spectrum disorder. *JAMA Neurol*. 2013; 70(9):1110–7. PMID: [23897062](#)
53. Abboud H, Petrak A, Mealy M, Sasidharan S, Siddique L, Levy M. Treatment of acute relapses in neuromyelitis optica: Steroids alone versus steroids plus plasma exchange. *Multiple sclerosis (Houndmills, Basingstoke, England)*. 2015.
